# Supplementary material for: Cu-Deficient plasmonic Cu2−xS nanocrystals induced tunable photocatalytic activities
Source: Royal Society of Chemistry journal article supplement (doi:10.1039/c9ce01501a), 2019-12-02
Supplement: c9ce01501a1.pdf [file c9ce01501a1.pdf]

## SUPPORTING INFORMATION

### **Cu-deficient plasmonic Cu<sub>2-x</sub>S nanocrystals induced tunable photocatalytic activities**

Xiao Shao<sup>a</sup>, Tianyong Zhang<sup>a,b,c,\*</sup>, Yue Wu<sup>a</sup>, Xiaoyuan Ma<sup>a</sup>, Jingchao Wang<sup>a</sup>, Bin Li<sup>a,c\*</sup>,  
Shuang Jiang<sup>a,c\*</sup>

<sup>a</sup> *Tianjin Key Laboratory of Applied Catalysis Science and Technology, School of Chemical Engineering and Technology, Tianjin University, Tianjin 300354, China*

<sup>b</sup> *Collaborative Innovation Center of Chemical Science and Engineering(Tianjin), Tianjin 300072, China*

<sup>c</sup> *Tianjin Engineering Research Center of Functional Fine Chemicals, Tianjin 300354, China*

### SUPPORTING CALCULATIONS

Theoretical calculation of Cu<sub>2-x</sub>S NCs free carrier concentration is following: The carrier density can be calculated based on the Mie-Drude model, in which the relationship between the LSPR frequency ( $\omega_{sp}$ ) and the bulk plasma oscillation frequency ( $\omega_p$ ) can be expressed as follows:

$$\omega_{sp} = \sqrt{\frac{\omega_p^2}{1 + \frac{1 - L_j}{L_j} \epsilon_m} - \gamma^2} \quad (1)$$

where  $L_j$  is a shape-dependent geometrical factor, which can be obtained based on the aspect ratios of nanodisks [1].  $\epsilon_m$  is the dielectric constant of the solvent, and  $\epsilon_m = 2.28$  is available for the solvent TCE.  $\gamma$  represents the FWHM of the plasmon resonance band on the energy scale, which can be obtained by fitting the absorption band based on a Gaussian function.  $\omega_p$  is the bulk plasmon oscillation frequency with the above expression. Herein, the geometrical factor  $L_j$  is calculated to be 0.33–0.43 for different nanodisks with variable aspect ratios. Thus  $\omega_p$  can be calculated to be 2.05–2.44 eV for different Cu<sub>2-x</sub>S NCs on the basis of the above expression (1). To calculate the free carrier density ( $N_h$ ), the following equation is applied:

(2)

$$\omega_p = \sqrt{\frac{N_h e^2}{\varepsilon_0 m_h}}$$

where  $e$  is the electron charge,  $\varepsilon_0$  is the free space permittivity, and  $m_h$  is the hole effective mass,  $m_h = 0.8m_0$ . From the above equation (eqn (2)), the carrier density  $N_h$  can be estimated to be  $2.50\sim 3.50 \times 10^{21} \text{ cm}^{-3}$  for a series of  $\text{Cu}_{2-x}\text{S}$  NCs synthesized by using different injection volume of S-OA solution, which are summarized in Table 1.

## SUPPLEMENTARY DATA

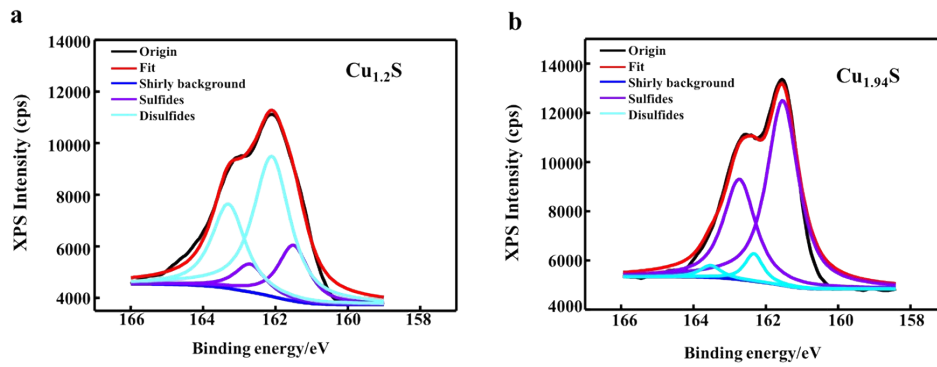

**Fig. 1** XPS spectra of the  $\text{Cu}_{2-x}\text{S}$  NCs synthesized by using different volume of S-OA solution: (a)  $\text{Cu}_{1.2}\text{S}$  and (b)  $\text{Cu}_{1.94}\text{S}$ .

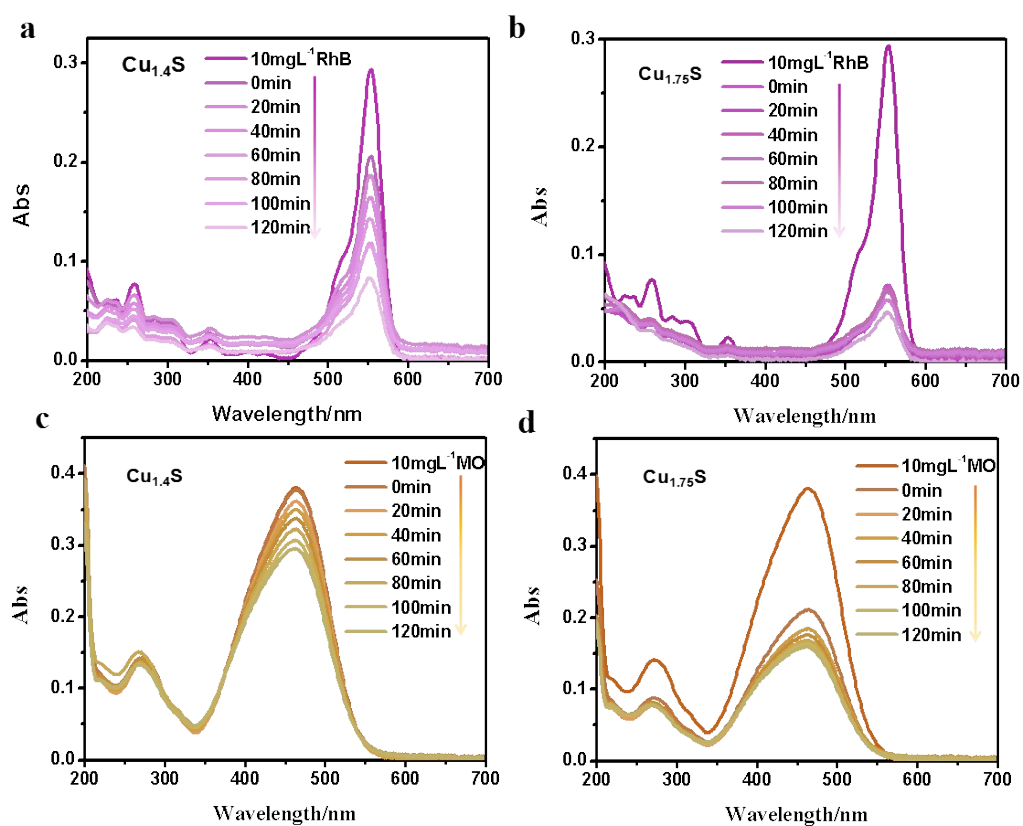

**Fig. S2** UV-visible spectra change of (a,b) RhB, (c,d) MO with Cu<sub>1.4</sub>S, Cu<sub>1.75</sub>S NCs as photocatalysts under UV irradiation, respectively.

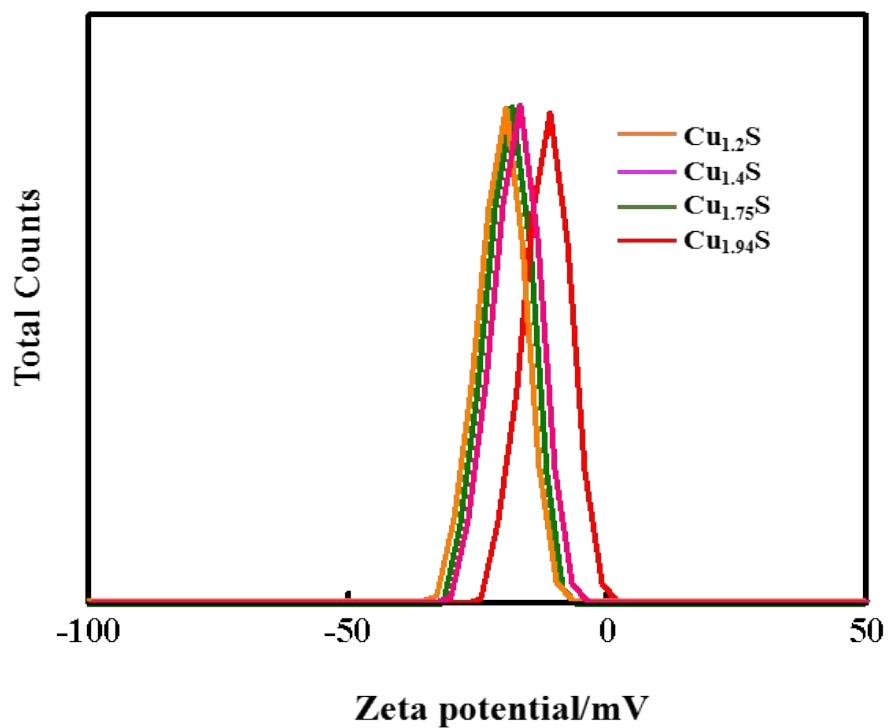

**Fig. S3** Zeta potential of Cu<sub>2-x</sub>S NCs at pH 7.0.

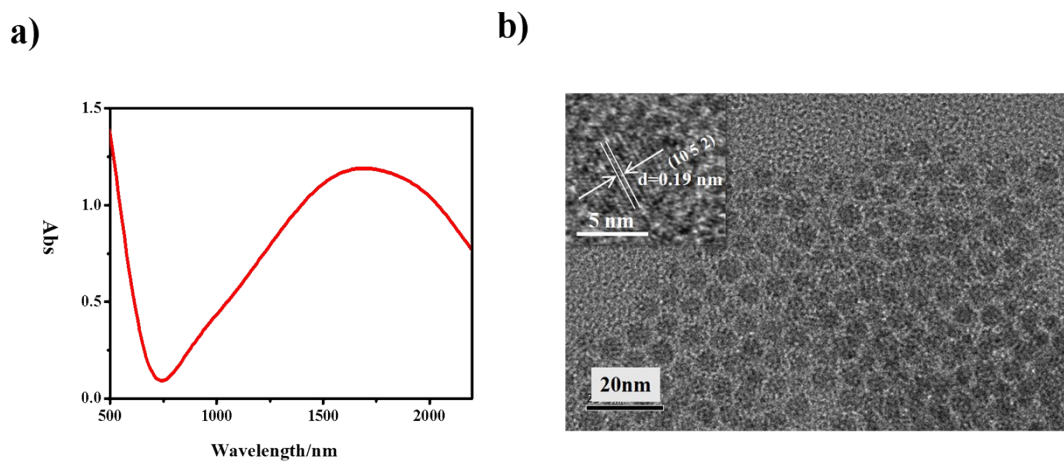

**Fig. S4** a) NIR LSPR absorption spectra of the Cu<sub>1.94</sub>S NCs; b) TEM images of Cu<sub>1.94</sub>S nanostructures. Inset: higher magnification of individual Cu<sub>1.94</sub>S NCs.

## REFERENCES

- 1 D. X. Zhu, A. W. Tang, H. H. Ye, M. Wang, C. H. Yang and F. Teng, *J. Mater. Chem. C*, 3 (2015) 6686–6691.
